# Supplementary material
Source: PubMed Central journal article supplement (PMC5747956)
Supplement: NIHMS902929-supplement-1.pdf [file NIHMS902929-supplement-1.pdf]

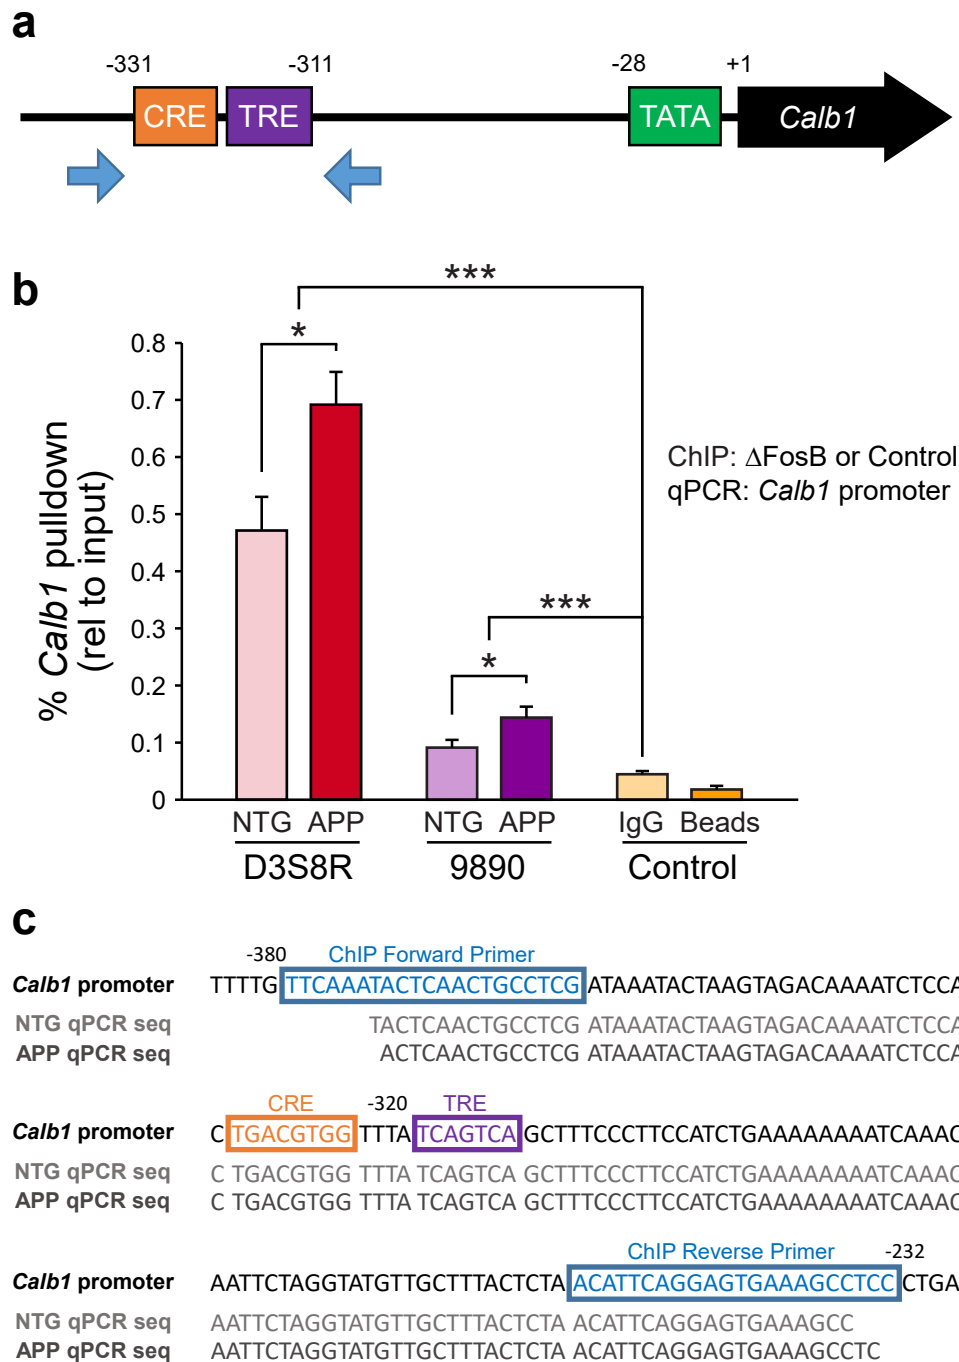

**Supplemental Figure 1: Signal-to-noise determination of  $\Delta$ FosB chromatin immunoprecipitation (ChIP) and *Calb1* promoter pulldown specificity. (a) Diagram depicting *Calb1* promoter and location of ChIP primers (blue arrows) used for amplifying CRE and TRE following  $\Delta$ FosB ChIP on whole mouse hippocampus. (b) *Calb1* promoter enrichment (shown as % of input) in ChIP experiments using two different  $\Delta$ FosB antibodies (D3S8R and 9890) and IgG control (n=8 mice/group; Welch's ANOVA:  $F_{5,15.5}=40.11$ ,  $p=2.49 \times 10^{-8}$ ; planned comparisons: 9890 vs. IgG  $***p=3 \times 10^{-5}$ , D3S8R vs. IgG  $***p=2.28 \times 10^{-9}$ , 9890 NTG vs. 9890 APP  $*p=0.042$ , D3S8R NTG vs. D3S8R APP  $*p=0.018$ ). Error bars represent SEM. ChIP experiments were performed using the Digital SLP probe sonifier. (c) Sequencing of ChIP-qPCR material obtained from  $\Delta$ FosB ChIP/*Calb1* promoter qPCR in NTG and APP mice.**

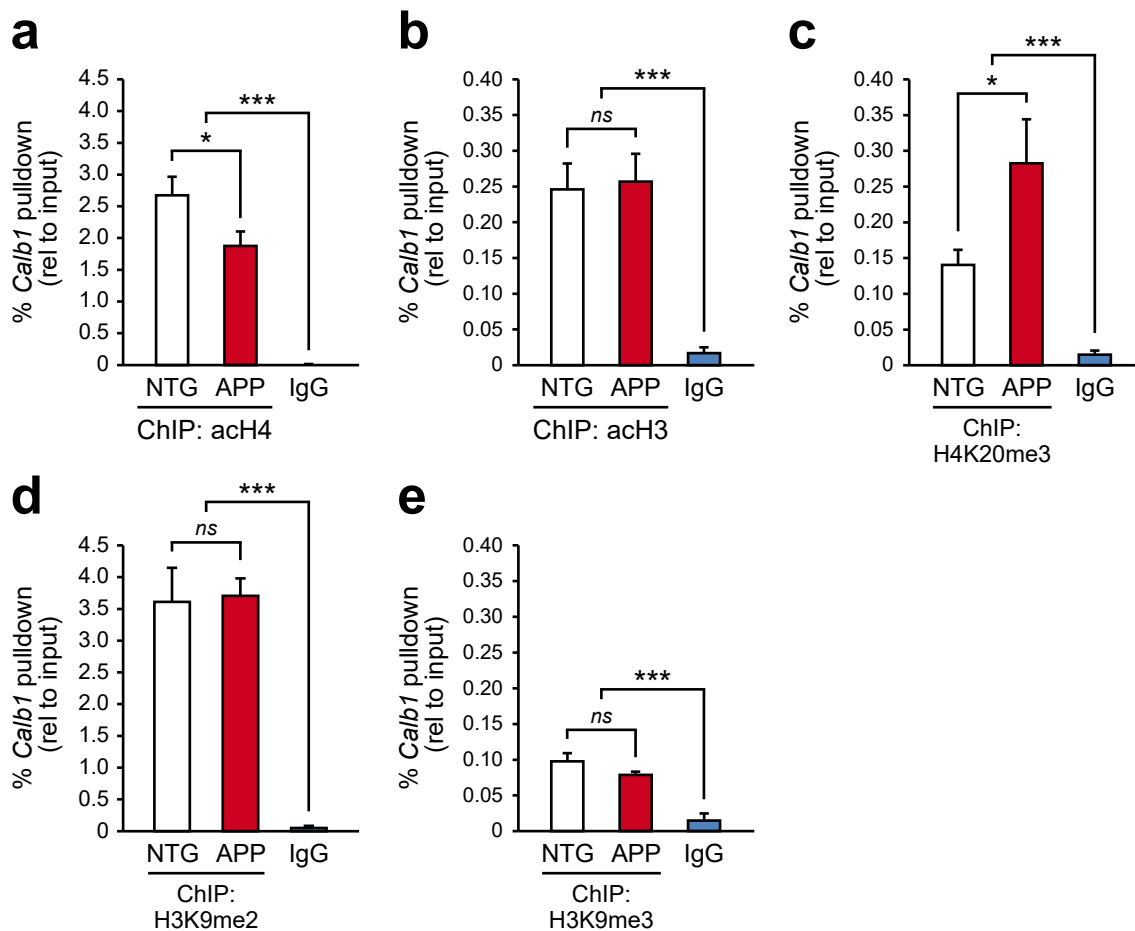

**Supplemental Figure 2: Signal-to-noise determination of histone ChIP experiments shown in the manuscript.** *Calb1* promoter enrichment (shown as % of input) displayed alongside IgG control ChIPs for (a) acetylated histone 4 (Welch's ANOVA:  $F_{2,10}=70.15$ ,  $p=1 \times 10^{-6}$ ; planned comparisons: NTG vs. APP  $*p=0.049$ ; acH4 vs. IgG  $***p=5.1 \times 10^{-9}$ ), (b) acetylated histone 3 (Welch's ANOVA:  $F_{2,10.1}=33.53$ ,  $p=3.5 \times 10^{-5}$ ; planned comparisons: NTG vs. APP  $p=0.84$ ; acH3 vs. IgG  $***p=2.8 \times 10^{-7}$ ), (c) trimethylated histone 4 lysine 20 (Welch's ANOVA:  $F_{2,14.4}=29.02$ ,  $p=9 \times 10^{-6}$ ; planned comparisons: NTG vs. APP  $*p=0.032$ ; acH3 vs. IgG  $***p=1.2 \times 10^{-5}$ ), (d) dimethylated histone 3 lysine 9 (Welch's ANOVA:  $F_{2,8.2}=99.61$ ,  $p=2 \times 10^{-6}$ ; planned comparisons: NTG vs. APP  $p=0.88$ ; acH3 vs. IgG  $***p=6.9 \times 10^{-7}$ ), (e) trimethylated histone 3 lysine 9 (Welch's ANOVA:  $F_{2,7.7}=18.53$ ,  $p=0.001$ ; planned comparisons: NTG vs. APP  $p=0.17$ ; acH3 vs. IgG  $***p=0.001$ ). ChIP experiments were performed using the Digital SLP probe sonifier.  $n=4$  mice for respective IgG control ChIPs. Histone ChIP sample sizes are reported in Figure 1 of the main manuscript. *ns*, non-significant. Error bars represent SEM.

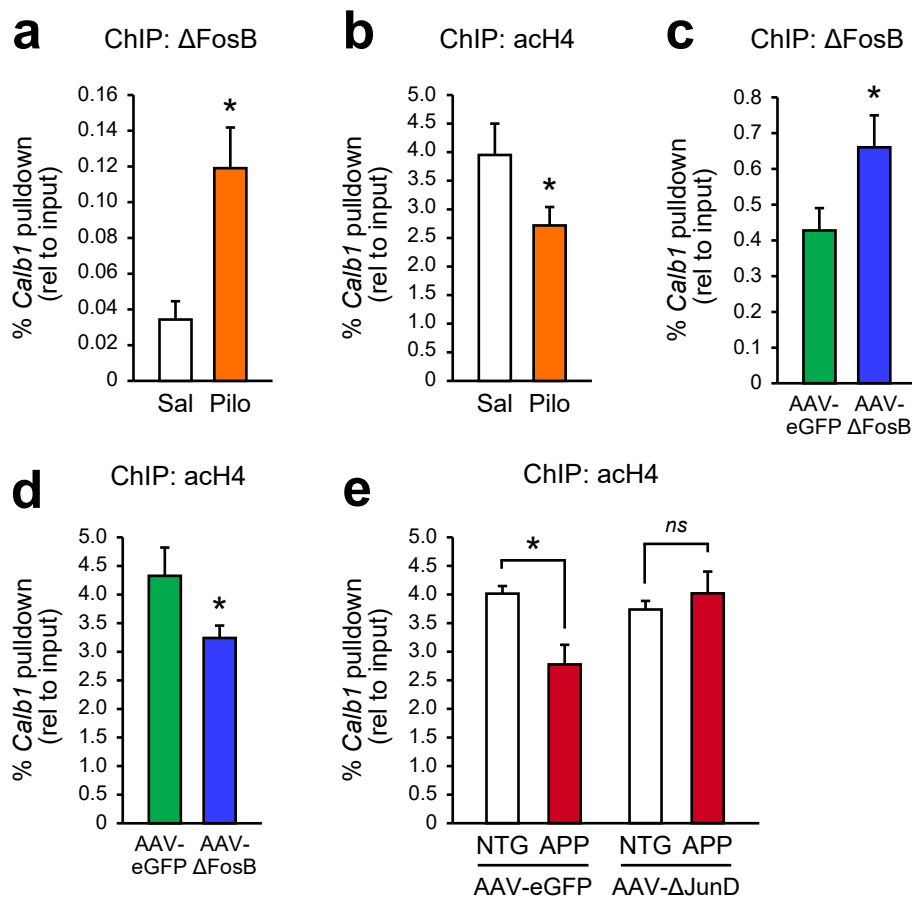

**Supplemental Figure 3: Results of ChIP experiments from Figures 1-3 shown as % of input.** *Calb1* promoter enrichment for (a)  $\Delta$ FosB in pilocarpine-treated mice ( $t_6=3.4$ ,  $*p=0.015$ ), (b) acetylated histone 4 in pilocarpine-treated mice ( $t_6=-1.94$ , one-tail  $*p=0.05$ ), (c)  $\Delta$ FosB in wild-type mice that received bilateral hippocampal infusion of adenoassociated virus carrying  $\Delta$ FosB/eGFP (AAV- $\Delta$ FosB) ( $t_{12}=2.14$ ,  $*p=0.05$ ), (d) acetylated histone 4 in AAV- $\Delta$ FosB mice ( $t_{12}=-2.21$ ,  $*p=0.047$ ), and (e) acetylated histone 4 in mice that received bilateral hippocampal infusion of AAV carrying  $\Delta$ JunD/eGFP (AAV- $\Delta$ JunD) (two-way ANOVA: genotype  $F_{1,20}=3.01$ ,  $p=0.098$ , treatment  $F_{1,20}=3.07$ ,  $p=0.095$ , interaction  $F_{1,20}=7.656$ ,  $p=0.012$ ; Tukey's HSD: AAV-eGFP/NTG vs. APP  $*p=0.022$ , AAV- $\Delta$ JunD/NTG vs. APP  $p=0.88$ ). ChIP experiments for all panels were performed using the Q800R bath sonicator except for panel (c), in which the Digital SLP probe sonifier was used. Sample sizes are reported in the main manuscript. Data in panels (a-d) were analyzed via Student's t-tests. Error bars represent SEM.

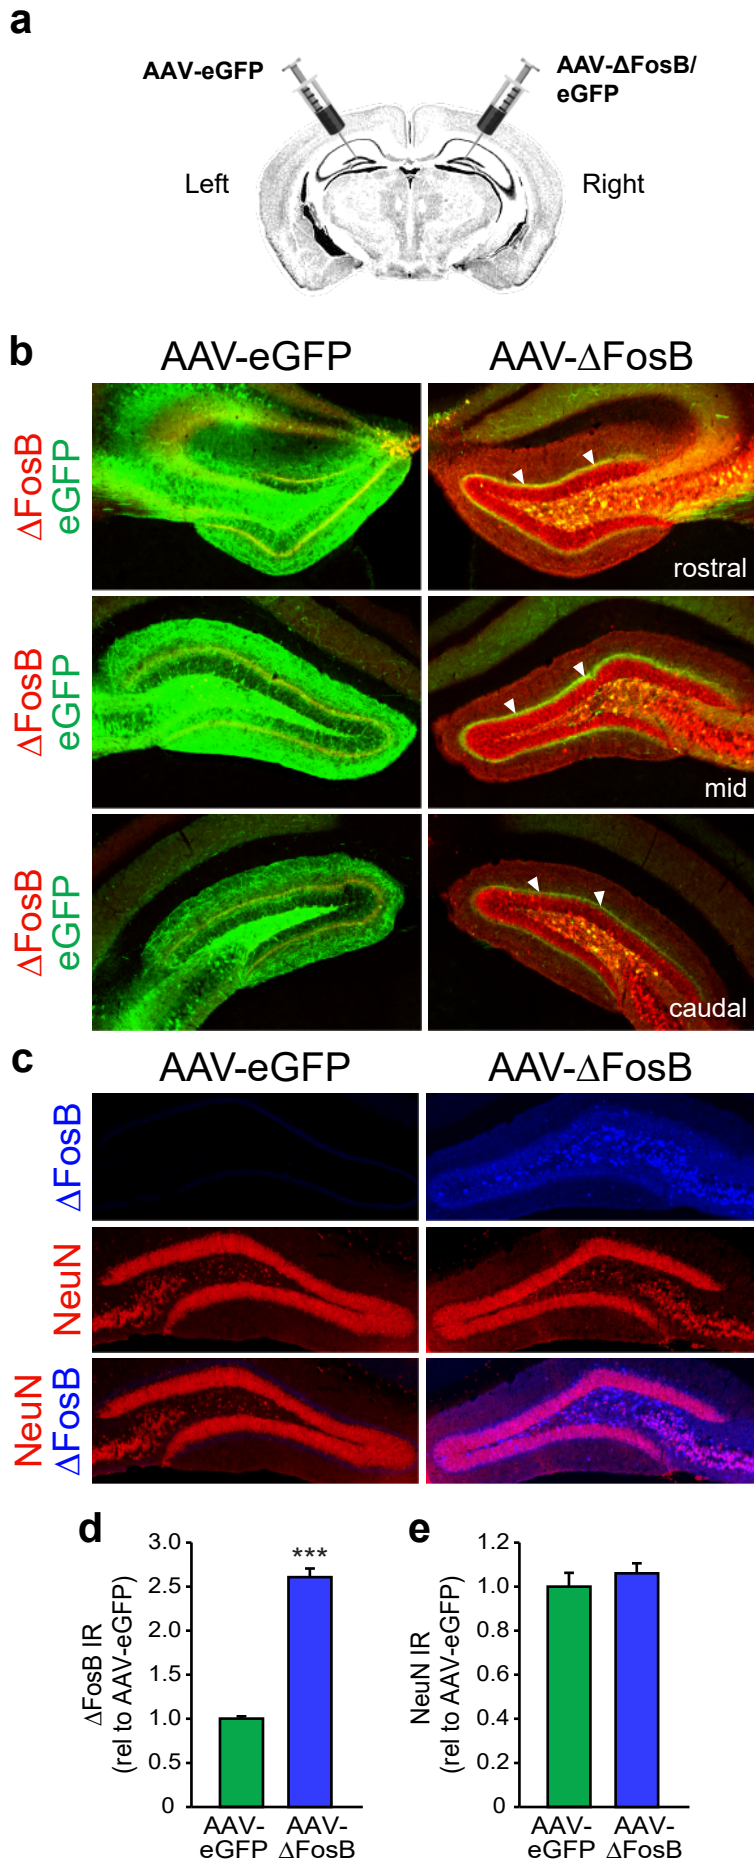

**Supplemental Figure 4: Virus-mediated expression of  $\Delta$ FosB covers the rostral-caudal extent of the dentate gyrus in wild-type mice, and does not impact cell survival or expression of housekeeping genes.** (a) Virus infusion scheme: adeno-associated virus carrying CMV promoter-driven  $\Delta$ FosB/eGFP (AAV- $\Delta$ FosB) was infused into the right hippocampus of wild-type mice whereas virus carrying eGFP (AAV-eGFP) was infused into the left hippocampus as control. (b,d) Example images and quantification of  $\Delta$ FosB immunoreactivity (IR) in the left and right dentate gyri (left and right panels, respectively) of mice that received left-sided AAV-eGFP infusion and right-sided AAV- $\Delta$ FosB infusion (n=4 mice/treatment; paired t-test:  $t_3=17.4$ , \*\*\* $p=4.13 \times 10^{-4}$ ). eGFP expression is also shown. Arrowheads denote eGFP-containing projections from the contralateral dentate gyrus. (c,e) NeuN IR in dentate gyrus granule cells transduced with AAV-eGFP (left panels) or AAV- $\Delta$ FosB (right panels) (n=4 mice/treatment; paired t-test:  $t_3=1.71$ ,  $p=0.19$ ). Error bars represent SEM.

## $\Delta$ FosB

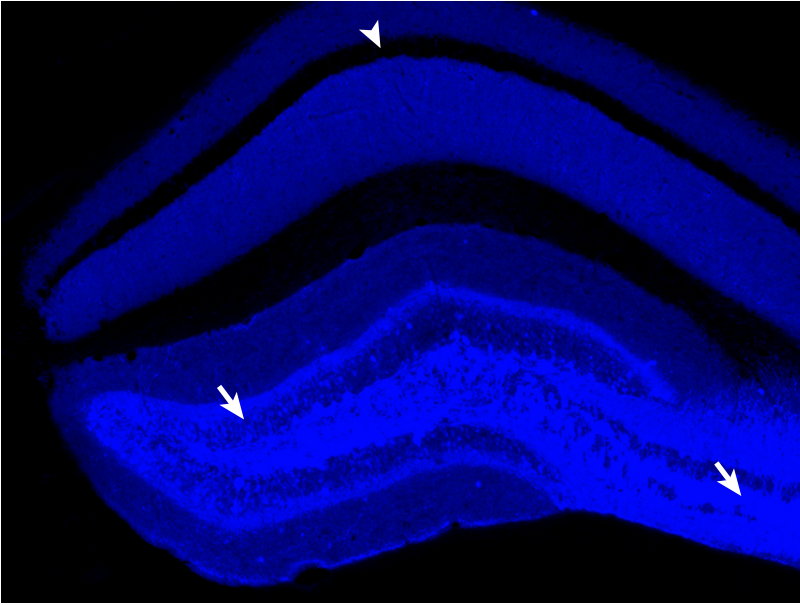

**Supplemental Figure 5: Low-magnification image of the hippocampus 28 days after AAV- $\Delta$ FosB infusion (related to Figure 2a).** Relatively specific  $\Delta$ FosB expression can be observed in the dentate gyrus and CA3 (arrows), with no expression in CA1 stratum pyramidale (arrowhead). Expression of  $\Delta$ FosB in CA1 stratum radiatum is due to accumulation of  $\Delta$ FosB in Schaeffer collateral projections from CA3. Although the CMV promoter drives expression of  $\Delta$ FosB in both dentate gyrus and CA3, the effects of  $\Delta$ FosB on calbindin expression are specific to the dentate gyrus as CA3 pyramidal neurons do not endogenously express calbindin.

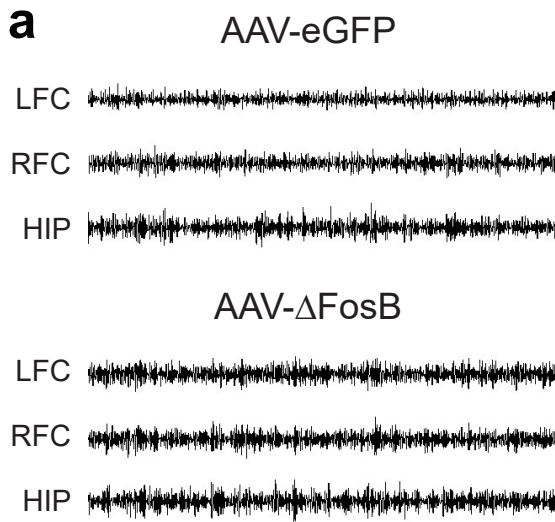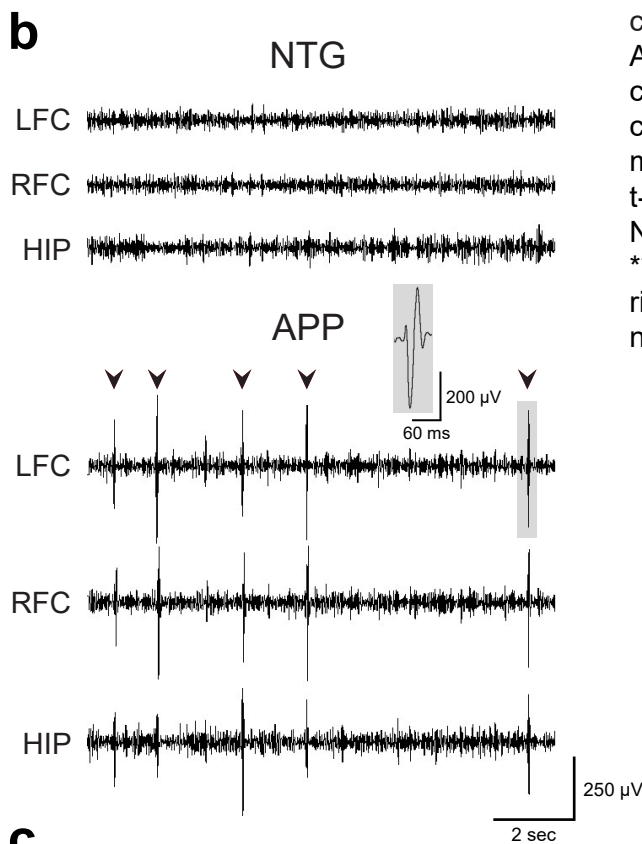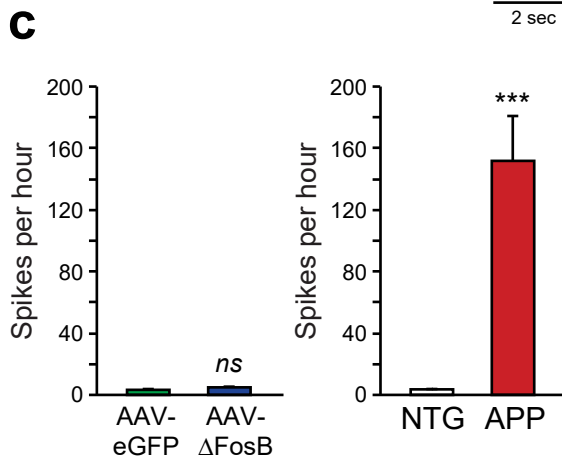

**Supplemental Figure 6: Virus-mediated expression of  $\Delta$ FosB does not generate epileptiform activity in the hippocampus.**

(a) Example electroencephalographic (EEG) traces from wild-type mice treated with AAV-eGFP or AAV- $\Delta$ FosB during a 48-hour recording session performed 28 days after bilateral hippocampal virus infusion. No seizures or epileptiform activity were detected after either treatment. (b) Example EEG traces from naive NTG and APP mice are shown for comparison. APP mice exhibit seizures (not shown) as well as epileptiform spikes lasting  $\sim$ 60 ms (indicated by arrowheads and magnified in the inset). (c) Hippocampal spike frequency in AAV-eGFP versus AAV- $\Delta$ FosB mice (left panel). Spike frequencies from NTG and APP mice are plotted for comparison (right panel). AAV- $\Delta$ FosB (n=5 mice) vs. AAV-eGFP (n=6 mice) Student's t-test:  $t_9=1.804$ ,  $p=0.1$ ; APP (n=8 mice) vs. NTG (n=10 mice) Student's t-test:  $t_{14}=5.109$ ,  $***p=2 \times 10^{-4}$ . LFC, left frontal cortex. RFC, right frontal cortex. HIP, hippocampus. ns, non-significant. Error bars represent SEM.

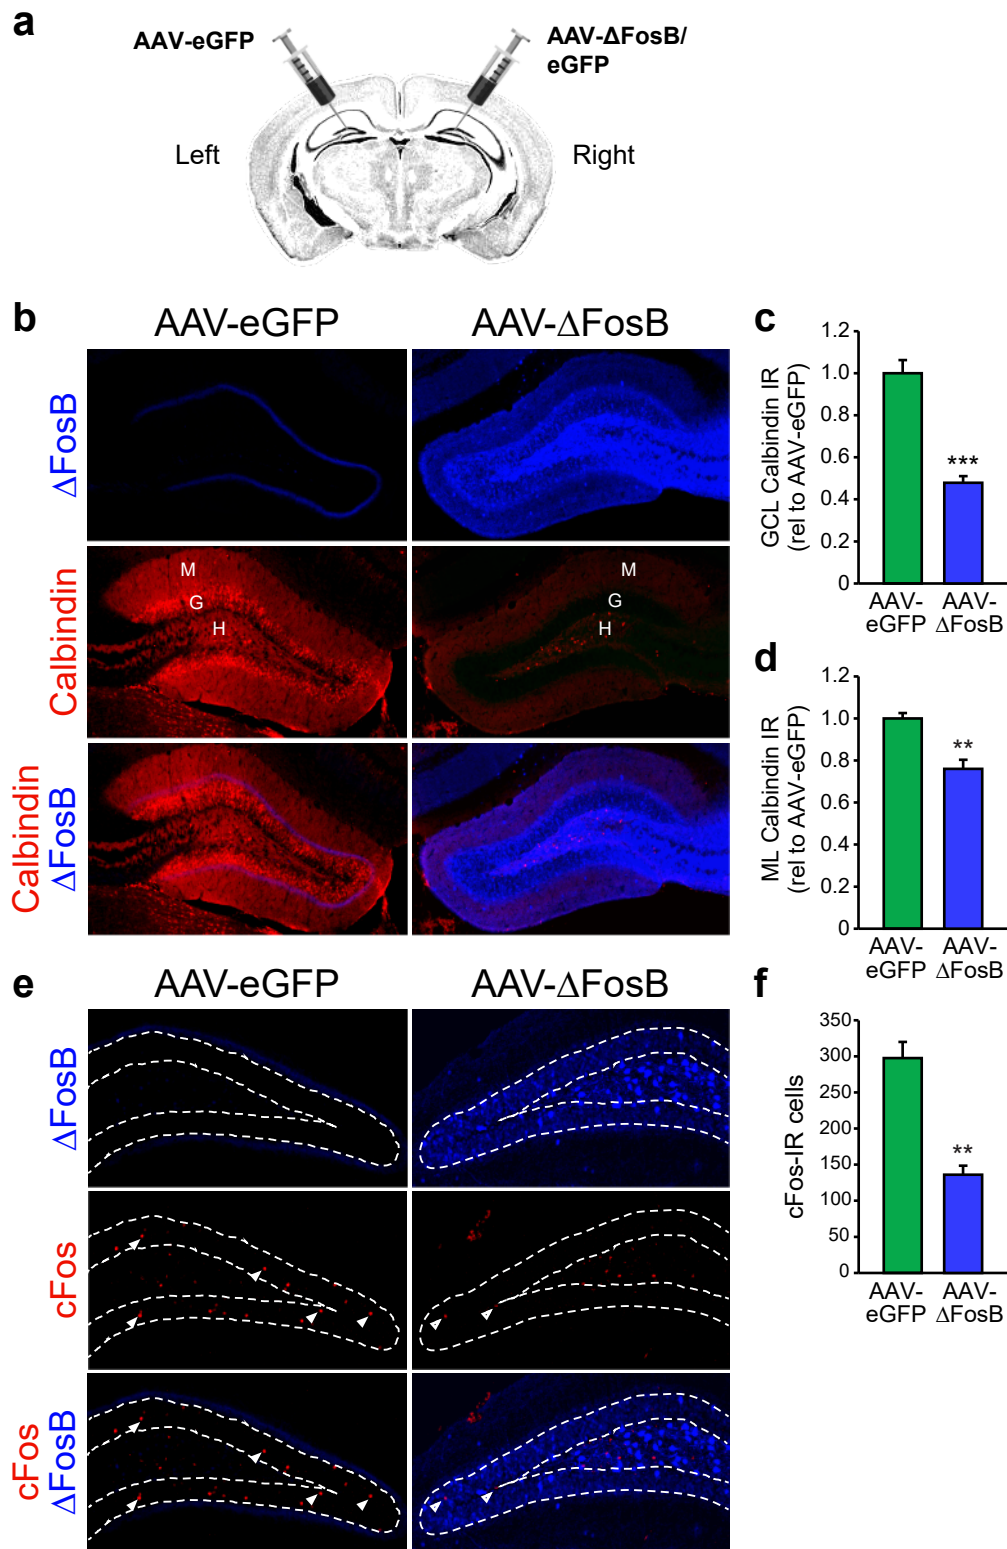

**Supplemental Figure 7:  $\Delta$ FosB suppresses expression of calbindin and cFos in the dentate gyrus.** (a) Virus infusion scheme: AAV- $\Delta$ FosB was infused into the right hippocampus of wild-type mice whereas AAV-eGFP was infused into the left hippocampus as control. (b) Images of  $\Delta$ FosB and calbindin IR in the dentate gyrus after infusion of AAV-eGFP (left panels) or AAV- $\Delta$ FosB (right panels). The molecular layer (M), granule cell layer (G), and hilus (H) of dentate gyrus can be observed and correspond to the dendrites, cell bodies, and axons of granule cells, respectively. (c,d) Quantification of calbindin IR in the granule cell layer (panel c: n=4 mice/treatment; paired t-test:  $t_3 = -14.2$ ,  $***p = 7.63 \times 10^{-4}$ ) and molecular layer (panel d: n=4 mice/treatment; paired t-test:  $t_3 = -6.67$ ,  $**p = 0.0069$ ). (e,f) Images and quantification of cFos IR in the dentate gyrus after infusion of either AAV-eGFP (left panels) or AAV- $\Delta$ FosB (right panels) (n=4 mice/treatment; paired t-test:  $t_3 = -9.56$ ,  $**p = 0.0024$ ). Dotted lines denote the boundaries of the granule cell layer in panel (e). Arrowheads, cFos-IR cells. Error bars represent SEM.

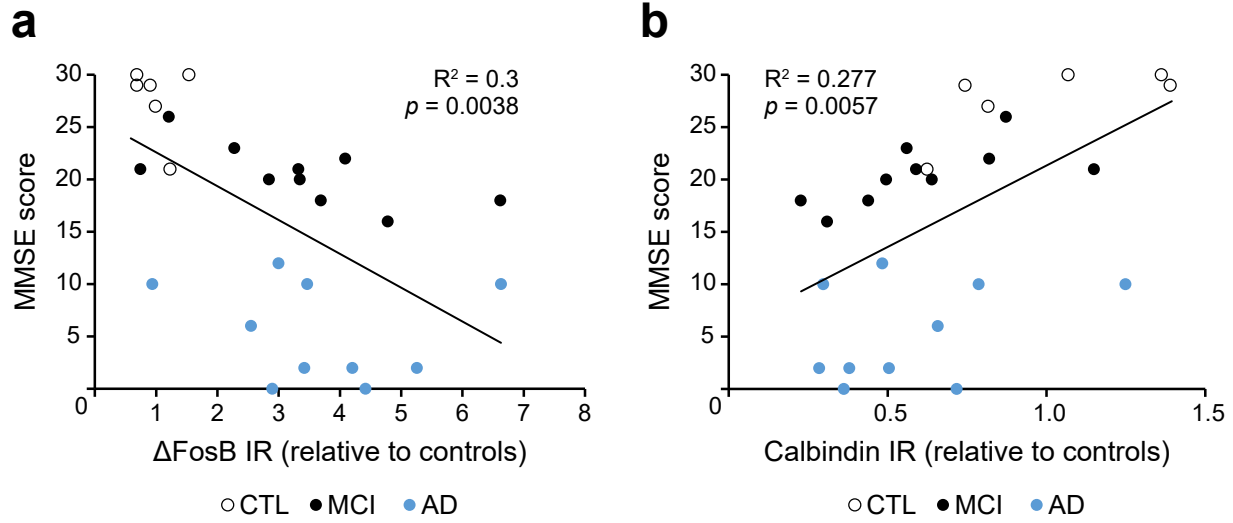

**Supplemental Figure 8: Increased  $\Delta$ FosB expression and decreased calbindin expression in the dentate gyrus of human patients correlate with cognitive deficits (n=26 patients). MMSE, Mini-Mental State Examination. CTL, control. MCI, mild cognitive impairment.**



**a**

| Diagnosis | MMSE | Age | Sex | Braak Stage |
|-----------|------|-----|-----|-------------|
| Control   | 30   | 94  | M   | 2           |
| Control   | 29   | 87  | M   | 1           |
| Control   | 21   | 69  | M   | 0           |
| Control   | 29   | 91  | M   | 3           |
| Control   | 30   | 63  | F   | 1           |
| Control   | 27   | 79  | F   | 0           |
| MCI       | 26   | 88  | M   | 6           |
| MCI       | 20   | 77  | M   | 6           |
| MCI       | 18   | 74  | M   | 6           |
| MCI       | 16   | 73  | F   | 6           |
| MCI       | 20   | 76  | F   | 6           |
| MCI       | 22   | 56  | M   | 6           |
| MCI       | 21   | 79  | F   | 6           |
| MCI       | 21   | 71  | M   | 6           |
| MCI       | 23   | 67  | M   | 5           |
| MCI       | 18   | 79  | F   | 6           |
| AD        | 10   | 66  | F   | 6           |
| AD        | 12   | 74  | F   | 6           |
| AD        | 0    | 71  | F   | 6           |
| AD        | 10   | 70  | F   | 6           |
| AD        | 6    | 64  | F   | 6           |
| AD        | 0    | 65  | F   | 6           |
| AD        | 10   | 75  | M   | 6           |
| AD        | 2    | 61  | M   | 6           |
| AD        | 2    | 57  | F   | 6           |
| AD        | 2    | 78  | M   | 6           |

**b**

| Diagnosis | Age | Sex | Pathology             |
|-----------|-----|-----|-----------------------|
| TLE       | 60  | F   | Hippocampal sclerosis |
| TLE       | 38  | F   | Hippocampal sclerosis |
| TLE       | 43  | M   | Hippocampal sclerosis |
| TLE       | 32  | M   | Hippocampal sclerosis |
| TLE       | 55  | F   | Hippocampal sclerosis |
| TLE       | 43  | F   | Hippocampal sclerosis |
| TLE       | 33  | F   | Hippocampal sclerosis |
| TLE       | 38  | F   | Hippocampal sclerosis |

**Supplemental Figure 9: Available patient information for (a) fixed dentate gyrus samples from postmortem control, MCI, and AD patients and (b) hippocampal resection specimens from temporal lobe epilepsy (TLE) patients.** Controls for MCI and AD are defined by normal cognitive scores on clinical exams and/or lack of AD-related pathology in the hippocampus.
